# Supplementary material for: Reliability-based design optimization of offshore wind turbine support structures using analytical sensitivities and factorized uncertainty modeling
Source: Copernicus journal article supplement (doi:10.5194/wes-5-171-2020), 2020-01-29
Supplement: Supplementary file [file wes-5-171-2020-supplement-title-page.pdf › wes-5-171-2020-supplement-title-page.pdf]

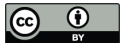

## *Supplement of*

# **Reliability-based design optimization of offshore wind turbine support structures using analytical sensitivities and factorized uncertainty modeling**

**Lars Einar S. Stieng and Michael Muskulus**

*Correspondence to:* Lars Einar S. Stieng (lars.stieng@ntnu.no)

- wes-5-171-2020-supplement-title-page.pdf
- data
  - BEAM-DA-CON\_constraint\_vals\_outer\_it\_no1.txt
  - BEAM-DA-CON\_design\_vars\_info\_outer\_it\_no1.txt
  - BEAM-DA-CON\_objective\_and\_eigenfrequency\_info\_outer\_it\_no1.txt
  - BEAM-DA\_constraint\_vals\_outer\_it\_no1.txt
  - BEAM-DA\_design\_vars\_info\_outer\_it\_no1.txt
  - BEAM-DA\_objective\_and\_eigenfrequency\_info\_outer\_it\_no1.txt
  - BEAM-PA-CON\_constraint\_vals\_outer\_it\_no1.txt
  - BEAM-PA-CON\_constraint\_vals\_outer\_it\_no3.txt
  - BEAM-PA-CON\_design\_vars\_info\_outer\_it\_no1.txt
  - BEAM-PA-CON\_design\_vars\_info\_outer\_it\_no3.txt
  - BEAM-PA-CON\_objective\_and\_eigenfrequency\_info\_outer\_it\_no1.txt
  - BEAM-PA-CON\_objective\_and\_eigenfrequency\_info\_outer\_it\_no2.txt
  - BEAM-PA-CON\_objective\_and\_eigenfrequency\_info\_outer\_it\_no3.txt
  - BEAM-PA\_constraint\_vals\_outer\_it\_no1.txt
  - BEAM-PA\_constraint\_vals\_outer\_it\_no4.txt
  - BEAM-PA\_design\_vars\_info\_outer\_it\_no1.txt
  - BEAM-PA\_design\_vars\_info\_outer\_it\_no4.txt
  - BEAM-PA\_objective\_and\_eigenfrequency\_info\_outer\_it\_no1.txt
  - BEAM-PA\_objective\_and\_eigenfrequency\_info\_outer\_it\_no2.txt
  - BEAM-PA\_objective\_and\_eigenfrequency\_info\_outer\_it\_no3.txt
  - BEAM-PA\_objective\_and\_eigenfrequency\_info\_outer\_it\_no4.txt

- OC3-DA\_constraint\_vals\_outer\_it\_no1.txt
- OC3-DA\_design\_vars\_info\_outer\_it\_no1.txt
- OC3-DA\_objective\_and\_eigenfrequency\_info\_outer\_it\_no1.txt
- OC3-PA-DT\_constraint\_vals\_outer\_it\_no1.txt
- OC3-PA-DT\_constraint\_vals\_outer\_it\_no4.txt
- OC3-PA-DT\_design\_vars\_info\_outer\_it\_no1.txt
- OC3-PA-DT\_design\_vars\_info\_outer\_it\_no4.txt
- OC3-PA-DT\_objective\_and\_eigenfrequency\_info\_outer\_it\_no1.txt
- OC3-PA-DT\_objective\_and\_eigenfrequency\_info\_outer\_it\_no2.txt
- OC3-PA-DT\_objective\_and\_eigenfrequency\_info\_outer\_it\_no3.txt
- OC3-PA-DT\_objective\_and\_eigenfrequency\_info\_outer\_it\_no4.txt
- OC3-PA-NW\_constraint\_vals\_outer\_it\_no1.txt
- OC3-PA-NW\_constraint\_vals\_outer\_it\_no4.txt
- OC3-PA-NW\_design\_vars\_info\_outer\_it\_no1.txt
- OC3-PA-NW\_design\_vars\_info\_outer\_it\_no4.txt
- OC3-PA-NW\_objective\_and\_eigenfrequency\_info\_outer\_it\_no1.txt
- OC3-PA-NW\_objective\_and\_eigenfrequency\_info\_outer\_it\_no2.txt
- OC3-PA-NW\_objective\_and\_eigenfrequency\_info\_outer\_it\_no3.txt
- OC3-PA-NW\_objective\_and\_eigenfrequency\_info\_outer\_it\_no4.txt
- OC3-PA-RND\_constraint\_vals\_outer\_it\_no1.txt
- OC3-PA-RND\_constraint\_vals\_outer\_it\_no5.txt
- OC3-PA-RND\_design\_vars\_info\_outer\_it\_no1.txt
- OC3-PA-RND\_design\_vars\_info\_outer\_it\_no5.txt
- OC3-PA-RND\_objective\_and\_eigenfrequency\_info\_outer\_it\_no1.txt
- OC3-PA-RND\_objective\_and\_eigenfrequency\_info\_outer\_it\_no2.txt
- OC3-PA-RND\_objective\_and\_eigenfrequency\_info\_outer\_it\_no3.txt
- OC3-PA-RND\_objective\_and\_eigenfrequency\_info\_outer\_it\_no4.txt
- OC3-PA-RND\_objective\_and\_eigenfrequency\_info\_outer\_it\_no5.txt
- OC3-PA\_constraint\_vals\_outer\_it\_no1.txt
- OC3-PA\_constraint\_vals\_outer\_it\_no3.txt
- OC3-PA\_design\_vars\_info\_outer\_it\_no1.txt
- OC3-PA\_design\_vars\_info\_outer\_it\_no3.txt
- OC3-PA\_objective\_and\_eigenfrequency\_info\_outer\_it\_no1.txt
- OC3-PA\_objective\_and\_eigenfrequency\_info\_outer\_it\_no2.txt
- OC3-PA\_objective\_and\_eigenfrequency\_info\_outer\_it\_no3.txt
- OC3-PU\_constraint\_vals\_outer\_it\_no1.txt
- OC3-PU\_constraint\_vals\_outer\_it\_no3.txt
- OC3-PU\_design\_vars\_info\_outer\_it\_no1.txt
- OC3-PU\_design\_vars\_info\_outer\_it\_no3.txt
- OC3-PU\_objective\_and\_eigenfrequency\_info\_outer\_it\_no1.txt
- OC3-PU\_objective\_and\_eigenfrequency\_info\_outer\_it\_no2.txt
- OC3-PU\_objective\_and\_eigenfrequency\_info\_outer\_it\_no3.txt

- OC3\_PF\_constraint\_vals\_outer\_it\_no1.txt
- OC3\_PF\_constraint\_vals\_outer\_it\_no4.txt
- OC3\_PF\_design\_vars\_info\_outer\_it\_no1.txt
- OC3\_PF\_design\_vars\_info\_outer\_it\_no4.txt
- OC3\_PF\_objective\_and\_eigenfrequency\_info\_outer\_it\_no1.txt
- OC3\_PF\_objective\_and\_eigenfrequency\_info\_outer\_it\_no2.txt
- OC3\_PF\_objective\_and\_eigenfrequency\_info\_outer\_it\_no3.txt
- OC3\_PF\_objective\_and\_eigenfrequency\_info\_outer\_it\_no4.txt
- README\_ALL\_FILES.txt

The copyright of individual parts of the supplement might differ from the CC BY 4.0 License.
